# Supplementary material
Source: PubMed Central journal article supplement (PMC3284859)
Supplement: jbjs-94-5-403-s1.pdf [file jbjs-94-5-403-s1.pdf]

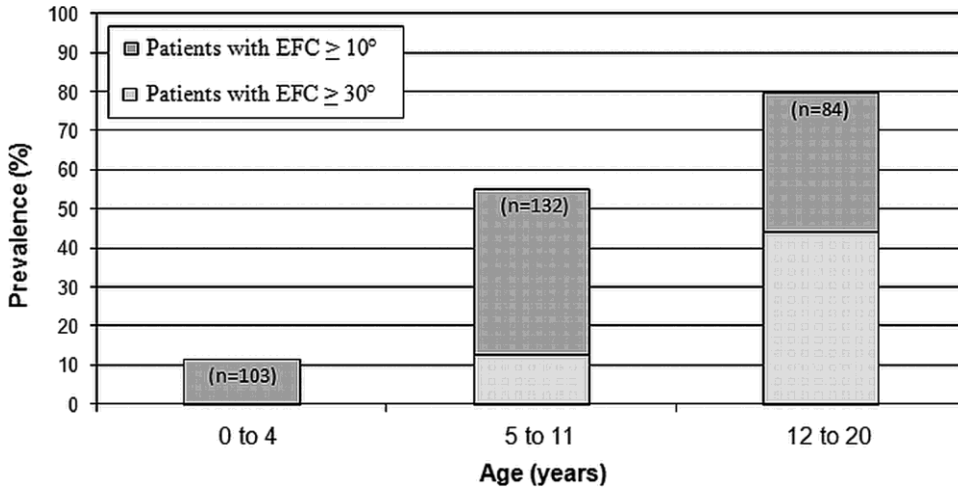

Fig. E-1  
Prevalence of  $\geq 10^\circ$  and  $\geq 30^\circ$  of elbow flexion contracture (EFC) according to age. The prevalence of contracture of  $\geq 10^\circ$  increased significantly with age ( $p < 0.001$ ).

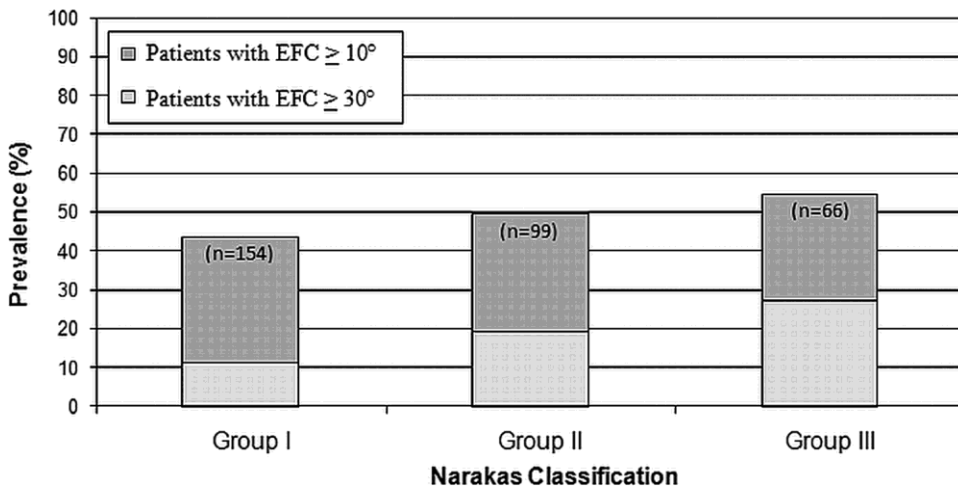

Fig. E-2  
Prevalence of  $\geq 10^\circ$  and  $\geq 30^\circ$  of elbow flexion contracture (EFC) according to the Narakas classification (groups I, II, and III). The increase in the prevalence of contracture of  $\geq 10^\circ$  with increasing brachial plexus involvement was not significant.

TABLE E-1 Extent of Brachial Plexus Involvement According to the Narakas Classification<sup>22</sup>

| Group | Affected Nerve Root   | Functional Impairment                                   |
|-------|-----------------------|---------------------------------------------------------|
| I     | C5, C6                | Shoulder abduction and external rotation, elbow flexion |
| II    | C5-C7                 | As above plus wrist drop                                |
| III   | Entire plexus (C5-T1) | Complete flaccid paralysis                              |
